# Supplementary material for: LnNP@ZIF8 Smart System for In Situ NIR-II Ratiometric Imaging-Based Tumor Drug Resistance Evaluation
Source: Nanomaterials (Basel). 2022 Dec 17;12(24):4478. doi: 10.3390/nano12244478 (PMC9782036; doi:10.3390/nano12244478)
Supplement: Supplementary file 1 [file nanomaterials-12-04478-s001.zip › nanomaterials-2024788-supplementary.pdf]

*Supplementary Materials*

## **LnNP@ZIF8 Smart System for In Situ NIR-II Ratiometric Imaging-Based Tumor Drug Resistance Evaluation**

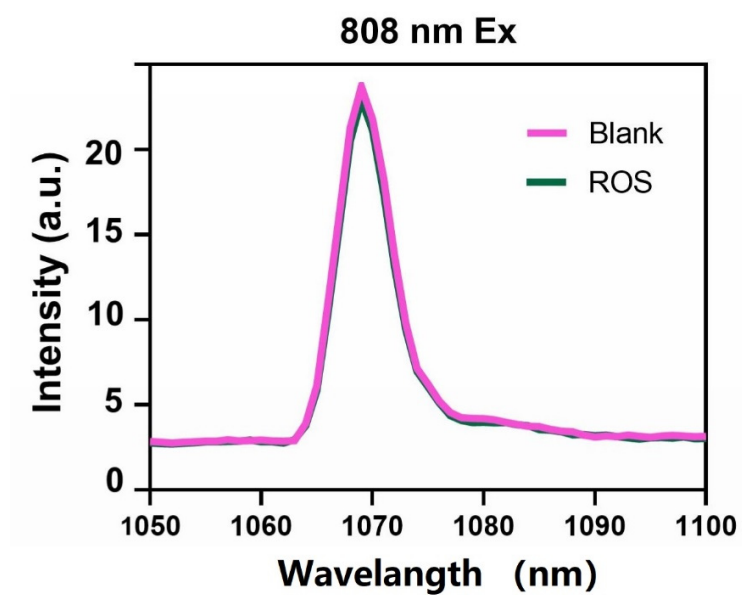

**Figure S1.** NIR-II emission spectra of LnNP treated with the addition of ROS or not upon excitation at 808 nm.

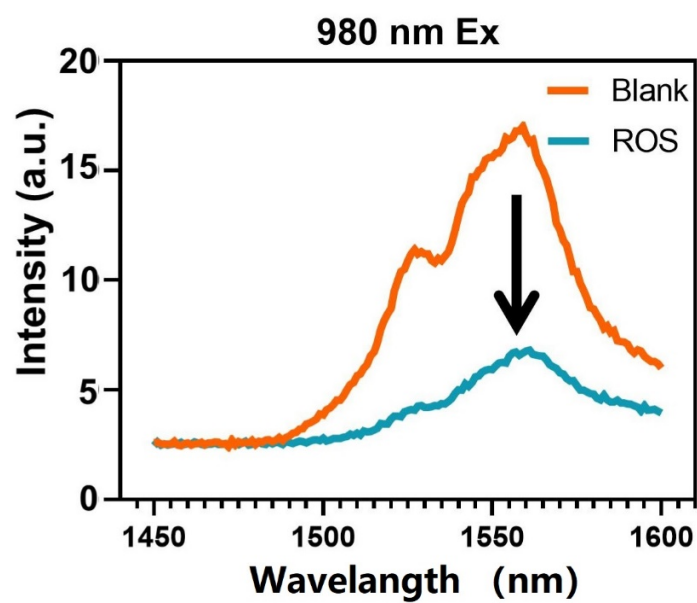

**Figure S2.** NIR-II emission spectra of LnNP treated with the addition of ROS or not upon excitation at 980 nm.

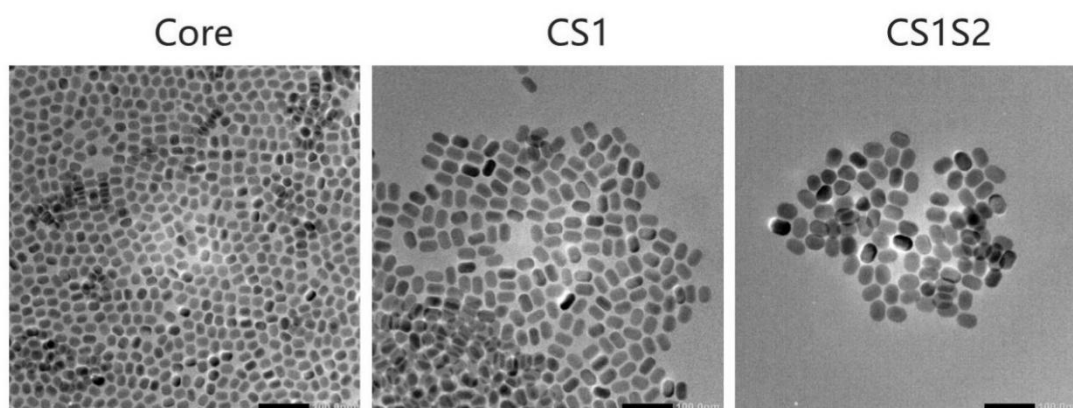

**Figure S3.** TEM images of core of LnNP core, LnNP CS1 and LnNP CS1S2 (Scale bar: 100 nm).

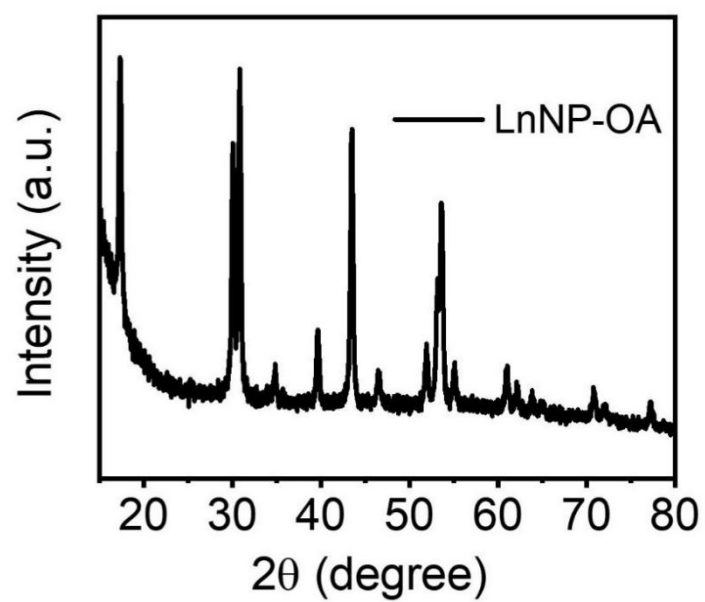

**Figure S4.** XRD patterns of LnNP-OA.

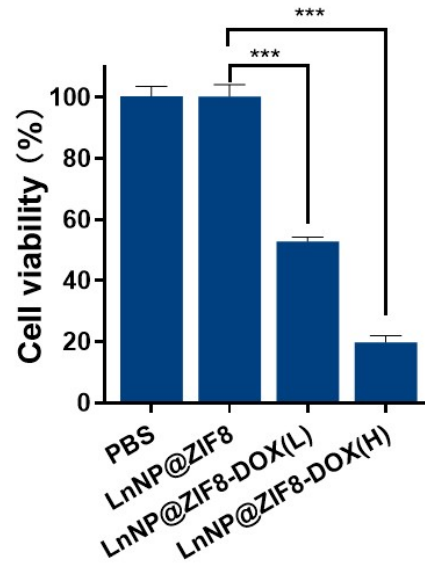

**Figure S5.** CCK-8 results of MCF-7-WT cells treated with PBS, LnNP@ZIF8, LnNP@ZIF8-DOX with lower DOX loading rate (LnNP@ZIF8-DOX(L)), and LnNP@ZIF8-DOX with higher DOX loading rate (LnNP@ZIF8-DOX(H)) after 24 h cultivation under equivalent DOX concentrations of 0, 0, 4.1, 17.0  $\mu\text{g/mL}$ . Results are presented as means  $\pm$  standard deviation (SD) (n=3, \*p<0.05, \*\*p<0.01, \*\*\*p<0.001).

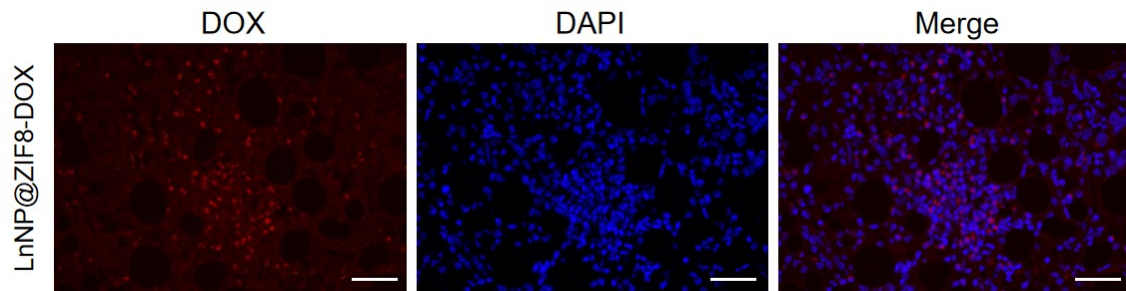

**Figure S6.** uptake and distribution of DOX in tumor tissues after the injection of LnNP@ZIF8-DOX (n = 3). Red: DOX; blue: DAPI. Scale bar: 100  $\mu\text{m}$ .

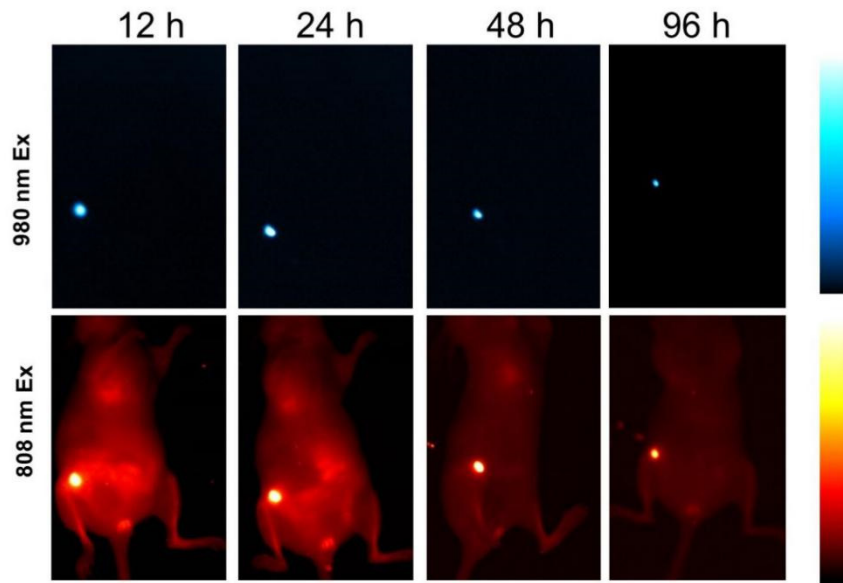

**Figure S7.** NIR-II FL imaging of MCF-7 tumor mice treated with LnNP-ZIF8@DOX under 808 and 980 nm laser irradiation at different time points.

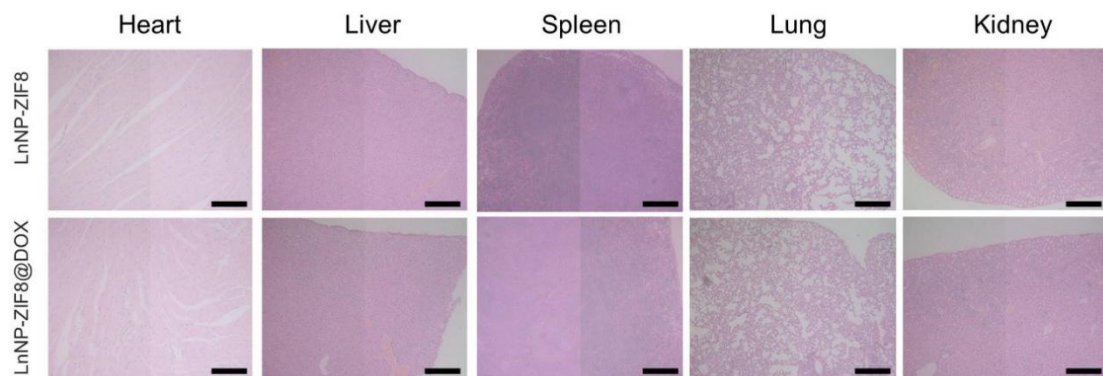

**Figure S8.** H&E staining images of heart, liver, spleen, lung and kidney in different experimental groups after 7 days of treatment. Scale bar: 200  $\mu$ m.

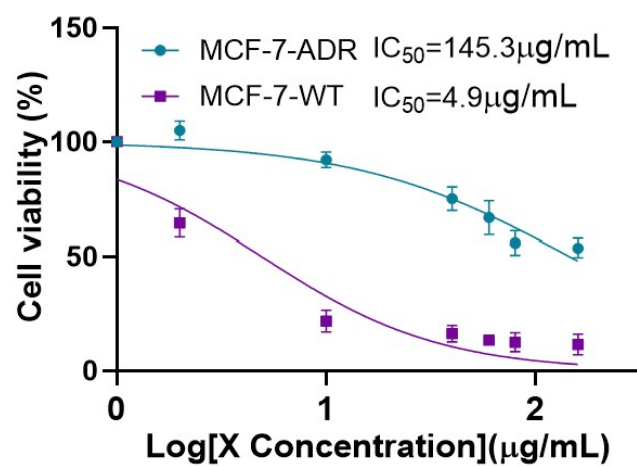

**Figure S9.** IC<sub>50</sub> of the LnNP@ZIF8-DOX in the MCF-7-WT and MCF-7-ADR cells. X-axis: cell viability (%); y-axis: log (DOX concentration), (log (μg/mL)).
